# Supplementary material for: Two New Rapid SNP-Typing Methods for Classifying Mycobacterium tuberculosis Complex into the Main Phylogenetic Lineages
Source: PubMed Central journal article supplement (PMC3401130; doi:10.1371/journal.pone.0041253), 2012-07-20
Supplement: pone.0041253.s001.pdf [file pone.0041253.s001.pdf]

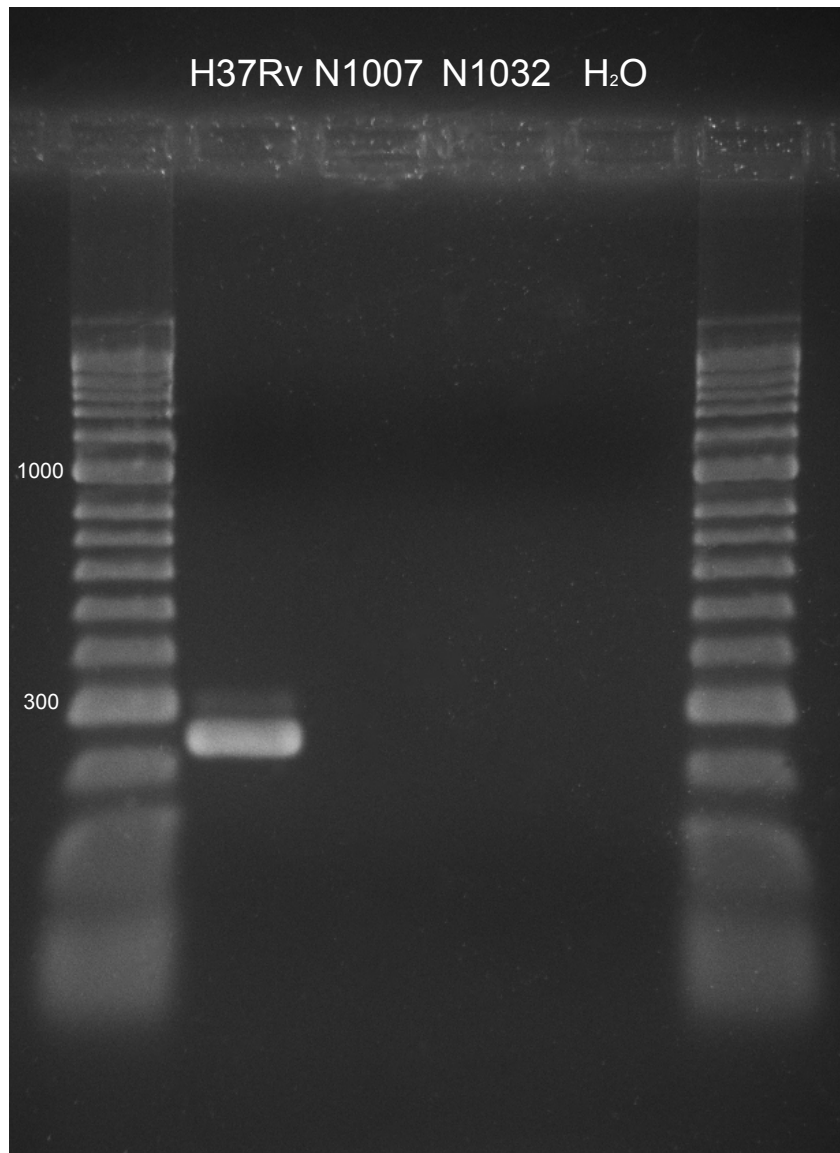

**Figure S1. PCR of Rv3114 covering the SNP specific for the *M. bovis* / *M. caprae* clade (Rv3480645TG).** H37Rv was used as positive control (signal in MOL-PCR obtained), whereas N1007 and N1032 were the samples that did not result in any signal in MOL-PCR. Ladder is Hyperladder II (Bioline).
