# Supplementary material for: Two New Rapid SNP-Typing Methods for Classifying Mycobacterium tuberculosis Complex into the Main Phylogenetic Lineages
Source: PubMed Central journal article supplement (PMC3401130; doi:10.1371/journal.pone.0041253), 2012-07-20
Supplement: pone.0041253.s003.pdf [file pone.0041253.s003.pdf]

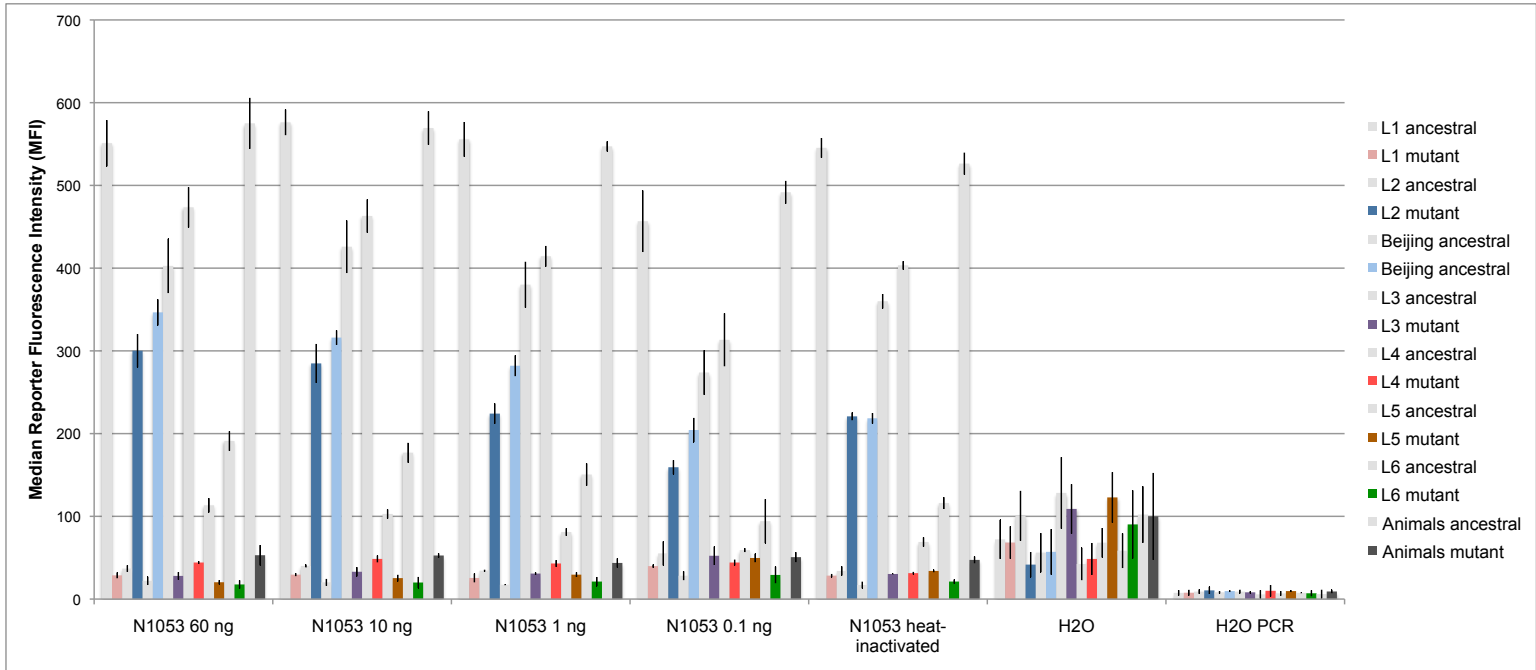

**Figure S3. Dilution series of DNA from a clinical isolate of Lineage 2/Beijing.**

Strain N1053 was previously characterized as strain of Lineage 2 / Beijing. Median reporter fluorescence intensity (Alexa532-primer) of MOL-PCR shown for each bead region and by different DNA amounts (CTAB-extracted) or crude extract (heat-inactivated). Error bars represent standard deviations calculated from triplicates.
